# Supplementary material for: Freestanding MoO2/Mo2C imbedded carbon fibers for Li-ion batteries
Source: Royal Society of Chemistry journal article supplement (doi:10.1039/c6cp07569j), 2016-12-15
Supplement: c6cp07569j1.pdf [file c6cp07569j1.pdf]

## Electronic Supplementary Information

### Free-standing MoO<sub>2</sub>/Mo<sub>2</sub>C Imbedded carbon fibers for Li-ion batteries

Hongqin Li,<sup>a</sup> Haijun Ye,<sup>a</sup> Zheng Xu<sup>a</sup>, Chuanyi Wang<sup>c</sup>, Jiao Yin<sup>c\*</sup>, Hui Zhu<sup>a,b\*</sup>

<sup>a</sup>College of Chemistry, Nanchang University, 999 Xuefu Avenue, Nanchang 330031, China

<sup>b</sup>State Key Laboratory of Electroanalytical Chemistry, Changchun Institute of Applied Chemistry, Chinese Academy of Sciences, Changchun, Jilin, P. R. China.

<sup>c</sup>Key Laboratory of Functional Materials and Devices for Special Environments, Xinjiang Technical Institute of Physics & Chemistry, Chinese Academy of Sciences, 40-1 South Beijing Road, Urumqi, Xinjiang 830011, China

\*Corresponding author. Tel.: 86-991-3835879. E-mail address: yinjiao@ms.xjb.ac.cn (Jiao Yin)

\*Corresponding author: Tel.: +86-791-83969565. E-mail: huizhu@ncu.edu.cn (Hui Zhu)

## **1. Experimental Section**

### **1.1 Preparation of MoO<sub>2</sub>/Mo<sub>2</sub>C ICFs derived from different concentration of phosphomolybdic acid**

10% PAN solutions were achieved with 1 g PAN and 10 ml DMF to form a homogeneous polymeric solution after vigorous stirring. Subsequently, 0.2 g and 0.3 g phosphomolybdic acid ( $\text{H}_3\text{PO}_4 \cdot 12\text{MoO}_3$ ) were respectively dissolved in above polymeric PAN solution under vigorous stirring, and then the as-prepared liquid was transferred to spin into fibers, which were subsequently experienced heat treatment in the muffle furnace at 280 °C for 2 h at a heat rate of 2 °C /min. Afterwards, the fibers placed in boat were transferred into tube furnace and carried out calcination at 800 °C for 2 h with the heating rate of 5 °C /min under the protection of hydrogen and argon (10% ppm) mixture. The resultant MoO<sub>2</sub>/Mo<sub>2</sub>C DCFs were respectively washed by ethanol and water. The two samples were referred as F-0.2P and F-0.3P. To investigate the effect of reaction temperature, the F-0.4P precursor and F-0.4P precursor also treated at 600 °C and 700 °C.

### **1.2 Preparation of MoO<sub>2</sub>/Mo<sub>2</sub>C ICFs derived from different concentration of ammonium molybdate**

In addition, 0.2322 g and 0.3483 g ammonium molybdate (1:1 by mole of Mo) were respectively used as Mo precursor. 0.2322 g and 0.3483 g  $(\text{NH}_4)_6\text{Mo}_7\text{O}_{24} \cdot 4\text{H}_2\text{O}$  were respectively added into 10% PAN solution. And then the mixture was heated in water bath (40 °C) with violent stirring until homogeneous solution was formed. Finally, the uniform solution was executed to electro-spin. The resultant MoO<sub>2</sub>/Mo<sub>2</sub>C ICFs were also respectively calcinated with same procedures of F-0.2P and F-0.3P followed by washing with ethanol and water. The two swamples were denoted as F-0.2A and F-0.3A.

### **1.3 Preparation of pure carbon fibers without adding any Mo precursor**

Furthermore, the blank sample was prepared via the same procedure as described above without adding any Mo resource, the sample was named as F-0P.

### **1.4 Preparation of MoO<sub>2</sub>/Mo<sub>2</sub>C composites**

Glucose and  $(\text{NH}_4)_6\text{Mo}_7\text{O}_{24} \cdot 4\text{H}_2\text{O}$  (1.5:1 by mass) was dispersed into distilled water (10 mL) under magnetic stirring until a homogeneous solution appeared. The mixture was dried

at 60 °C, and then annealed at 800 °C for 2 h in argon flow.

## 2. Figures and Tables

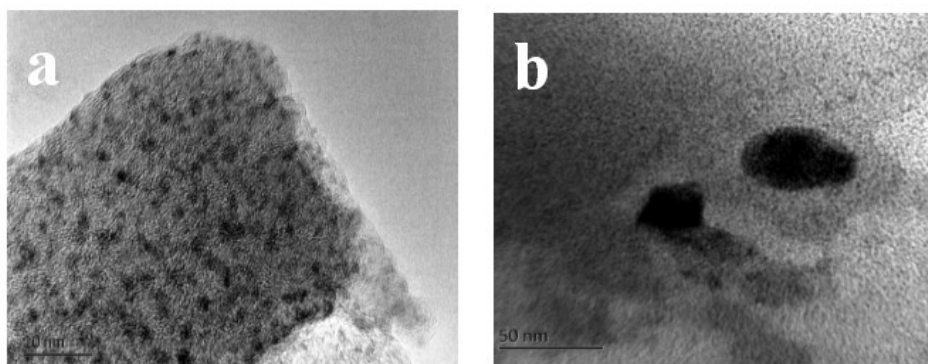

**Figure S1** TEM images of F-0.4P with different magnification.

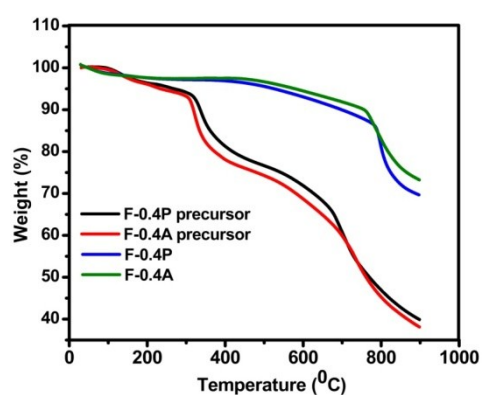

**Figure S2** TGA curves of  $\text{MoO}_2/\text{Mo}_2\text{C}$  ICFs and correlated precursors for synthesis

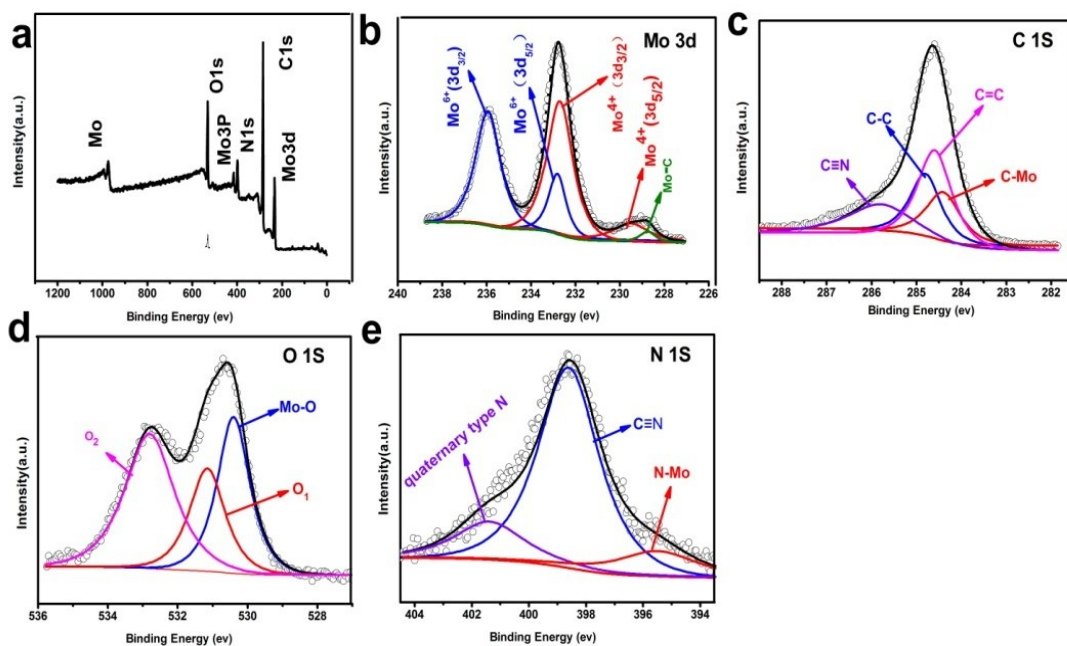

**Figure S3** XPS spectrum of  $\text{MoO}_2$  ICFs: overall spectrum (a); high-resolution of Mo 3d (b), C 1s (c), O 1s (d) and N 1s (e) spectrum for F-0.4A.

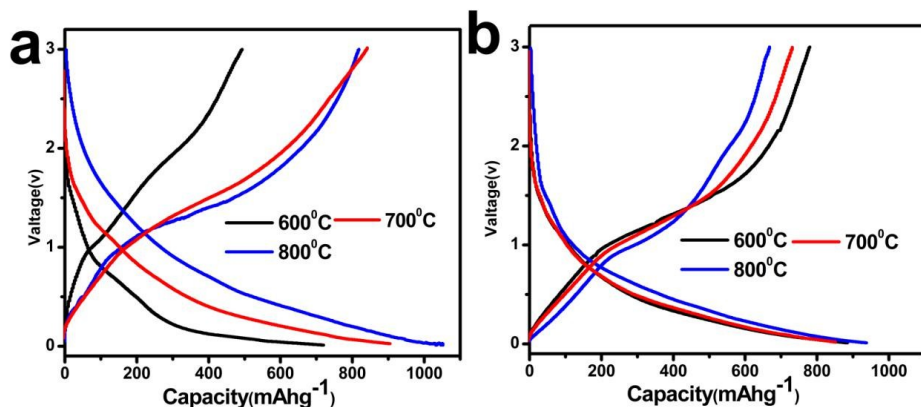

**Figure S4** The 2nd cycle charge/discharge curves of F-0.4P (a) and F-0.4A (b) in the potential range of 0.01-3 V (vs. Li/Li<sup>+</sup>) at a current density of 0.1 A g<sup>-1</sup> of 600 °C, 700 °C and 800 °C.

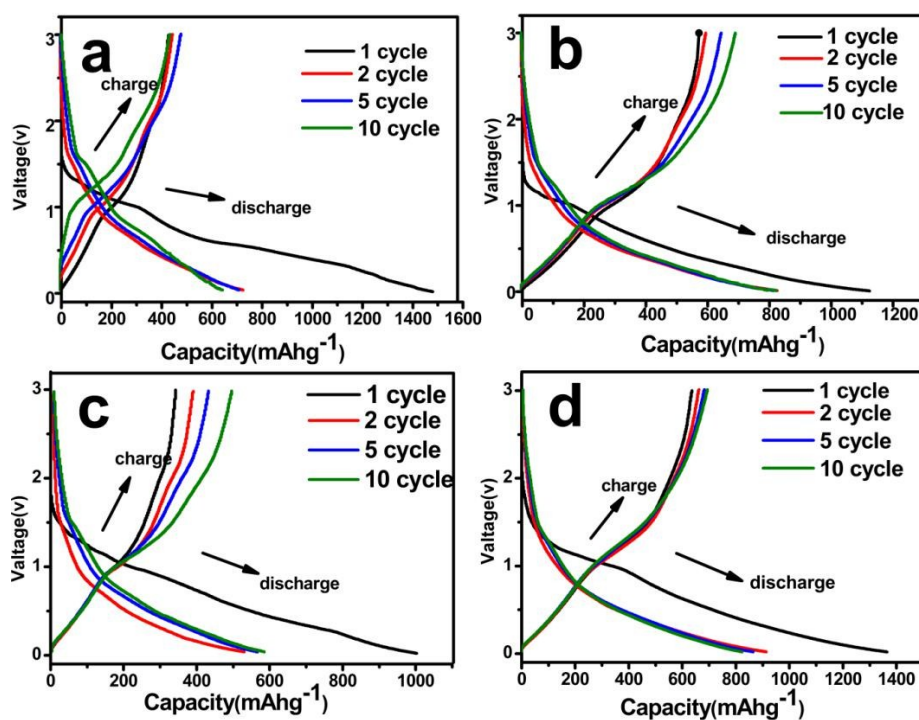

**Figure S5** The discharge-charge curves determined over the potential range of 0.01-3 V (vs Li/Li<sup>+</sup>) at a current density of 0.1 A g<sup>-1</sup> for F-0.2P (a), F-0.2A (b), F-0.3P (c) and F-0.3A (d), respectively.

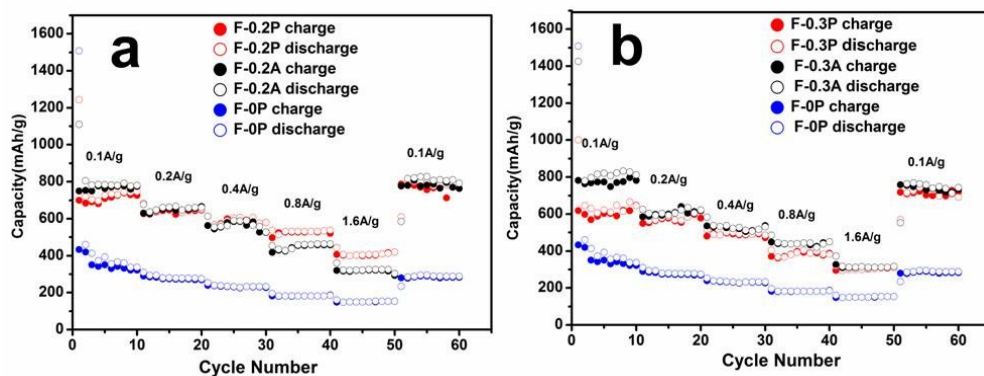

**Figure S6** Comparison of rate performance of as-prepared fibers: (a) F-0.2 and F-0P; (b) F-0.3 and F-0P at current density from 0.1 to 1.6 A g<sup>-1</sup>.

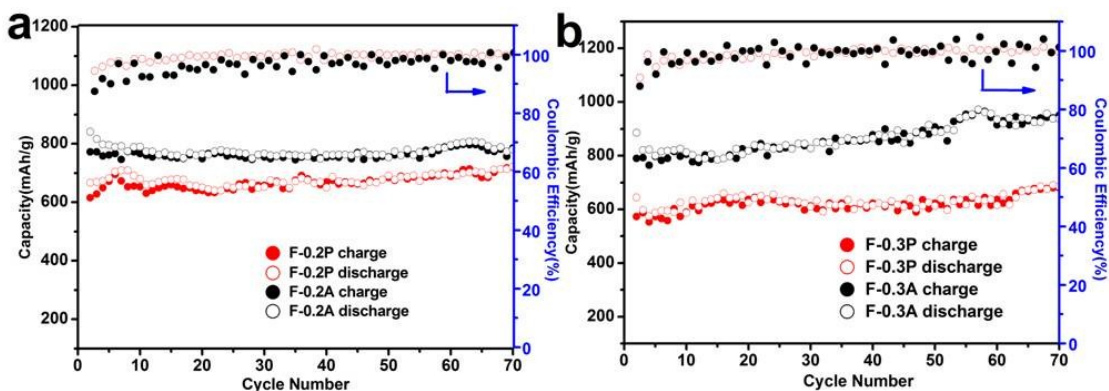

**Figure S7** Cyclic stability and Coulombic efficiency of F-0.2 (a) and F-0.3 (b) with a charge-discharge rate of 0.1 A g<sup>-1</sup> from the 2nd to the 70th cycle

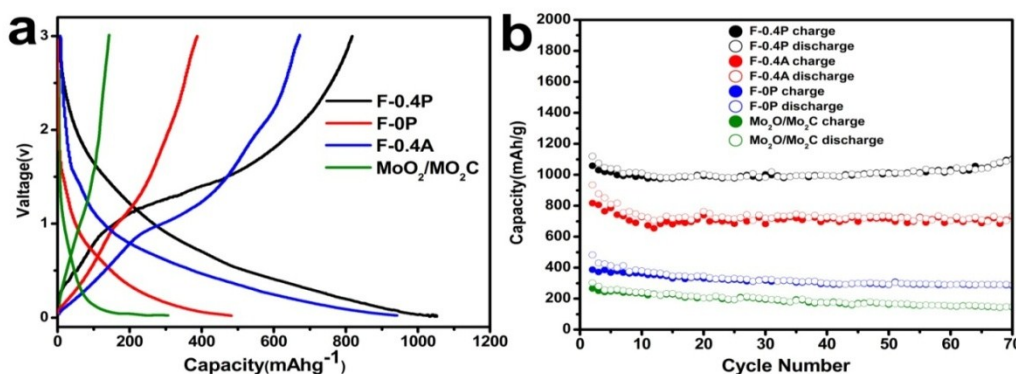

**Figure S8** Comparison of electrochemical performance of F-0.4P, F-0.4A, F-0P and MoO<sub>2</sub>/Mo<sub>2</sub>C: (a) The 2nd cycles discharge-charge curves determined over the potential range of 0.01-3 V (vs Li/Li<sup>+</sup>) at a current density of 0.1 A g<sup>-1</sup>. (b) Cyclic stability at a current density of 0.1 A g<sup>-1</sup> from the 2nd to the 70th cycles.

**Table S1.** The element weight percentage of MoO<sub>2</sub>/Mo<sub>2</sub>C ICFs text by EDX.

| Weight<br>percentage(%)<br>Element | Materials | F-0.4P | F-0.4A | F-0.3P | F-0.3A | F-0.2P | F-0.2A |
|------------------------------------|-----------|--------|--------|--------|--------|--------|--------|
|                                    |           |        |        |        |        |        |        |
| C                                  |           | 15.97  | 10.44  | 19.39  | 12.83  | 18.19  | 18.05  |
| O                                  |           | 40.33  | 43.43  | 38.15  | 35.31  | 55.65  | 50.82  |
| Mo                                 |           | 43.70  | 46.13  | 42.56  | 51.86  | 26.16  | 31.13  |

**Table S2.** Comparison of MoO<sub>2</sub>/Mo<sub>2</sub>C ICFs with reported MoO<sub>2</sub>/carbon composite in terms of electrochemical performance.

| Samples                                             | Mo precursor                                                                       | Initial<br>CE<br>(%) | Cycle<br>s  | Reversible<br>capacities<br>(mAh/g) | Rates<br>mA/g | Rate<br>capacity<br>(mAh/g) | Flexibility | Ref.            |
|-----------------------------------------------------|------------------------------------------------------------------------------------|----------------------|-------------|-------------------------------------|---------------|-----------------------------|-------------|-----------------|
| <b>MoO<sub>2</sub>/Mo<sub>2</sub>C ICFs</b>         | <b>H<sub>3</sub>PO<sub>4</sub>·12MoO<sub>3</sub></b>                               | <b>63.3</b>          | <b>70th</b> | <b>889</b>                          | <b>1600</b>   | <b>445</b>                  | <b>YES</b>  | <b>Our work</b> |
| MoO <sub>2</sub> -OMC                               | (NH <sub>4</sub> ) <sub>6</sub> Mo <sub>7</sub> O <sub>24</sub> ·4H <sub>2</sub> O | 63.6                 | 50th        | 1049.1                              | 1600          | 600                         | NO          | 4               |
| MoO <sub>2</sub> -OMC                               | H <sub>3</sub> PO <sub>4</sub> ·12MoO <sub>3</sub>                                 | 61.4                 | 50th        | 784                                 | 2000          | 401                         | NO          | 5               |
| MoO <sub>2</sub> @C nanofibers                      | (NH <sub>4</sub> ) <sub>6</sub> Mo <sub>7</sub> O <sub>24</sub> ·4H <sub>2</sub> O | 56.3                 | 50th        | ~520                                | 200           | 430.6                       | YES         | 8               |
| MoO <sub>2</sub> /C hybrids                         | H <sub>3</sub> PO <sub>4</sub> ·12MoO <sub>3</sub>                                 | ~55                  | 600th       | 602                                 | 800           | 409                         | NO          | 10              |
| MoO <sub>2</sub> -Mo <sub>2</sub> C-C               | (NH <sub>4</sub> ) <sub>6</sub> Mo <sub>7</sub> O <sub>24</sub> ·4H <sub>2</sub> O | 67.8                 | 50th        | 1050                                | 2000          | 445                         | NO          | 34              |
| MoO <sub>2</sub> /Mo <sub>2</sub> C Heteronanotubes | MoO <sub>3</sub>                                                                   | 85.8                 | 140th       | 410                                 | 1000          | 510                         | NO          | 37              |
| MoO <sub>2</sub> @C nanospheres                     | (NH <sub>4</sub> ) <sub>6</sub> Mo <sub>7</sub> O <sub>24</sub> ·4H <sub>2</sub> O | 76                   | 30th        | 570                                 | 3 C           | 410                         | NO          | 38              |
| MoO <sub>2</sub> Nanorods                           | H <sub>3</sub> PO <sub>4</sub> ·12MoO <sub>3</sub>                                 | ~71                  | 30th        | 512                                 | 1 C           | 260                         | NO          | 39              |
